# 1 **HiDRA-seq: High-Throughput SARS-CoV-2 Detection by RNA Barcoding and** 2 **Amplicon Sequencing**

3 Emilio Yángüez<sup>\*,1,#</sup>, Griffin White<sup>\*,1</sup>, Susanne Kreutzer<sup>1</sup>, Lennart Opitz<sup>1</sup>, Lucy Poveda<sup>1</sup>, Timothy Sykes<sup>1</sup>, Maria  
4 Domenica Moccia<sup>1</sup>, Catharine Aquino<sup>1</sup> and Ralph Schlapbach<sup>1</sup>.

5

6 <sup>1</sup> Functional Genomics Center Zurich (ETH/University of Zurich), Zurich, Switzerland.

7 \* These authors contributed equally to this work.

8 # Correspondence to: [emilio.yanguez@fgcz.ethz.ch](mailto:emilio.yanguez@fgcz.ethz.ch).

9

## 10 **Abstract**

11 The recent outbreak of a new coronavirus that causes a Severe Acute Respiratory Syndrome in humans  
12 (SARS-CoV-2) has developed into a global pandemic with over 6 million reported cases and more than  
13 375,000 deaths worldwide. Many countries have faced a shortage of diagnostic kits as well as a lack  
14 of infrastructure to perform necessary testing. Due to these limiting factors, only patients showing  
15 symptoms indicating infection were subjected to testing, whilst asymptomatic individuals, who are  
16 widely believed to be responsible for the fast dispersion of the virus, were largely omitted from the  
17 testing regimes. The inability to implement high throughput diagnostic and contact tracing strategies  
18 has forced many countries to institute lockdowns with severe economic and social consequences. The  
19 World Health Organization (WHO) has encouraged affected countries to increase testing capabilities  
20 to identify new cases, allow for a well-controlled lifting of lockdown measures, and prepare for future  
21 outbreaks. Here, we propose HiDRA-seq, a rapidly implementable, high throughput, and scalable  
22 solution that uses NGS lab infrastructure and reagents for population-scale SARS-CoV-2 testing. This  
23 method is based on the use of indexed oligo-dT primers to generate barcoded cDNA from a large  
24 number of patient samples. From this, highly multiplexed NGS libraries are prepared targeting SARS-  
25 CoV-2 specific regions and sequenced. The low amount of sequencing data required for diagnosis  
26 allows the combination of thousands of samples in a sequencing run, while reducing the cost to  
27 approximately 2 CHF/EUR/USD per RNA sample. Here, we describe in detail the first version of the  
28 protocol, which can be further improved in the future to increase its sensitivity and to identify other  
29 respiratory viruses or analyze individual genetic features associated with disease progression.

30

## 31 **Keywords**

32 SARS-CoV-2, Coronavirus, Next-Generation Sequencing (NGS), diagnostics, testing.

33

## 34 **Introduction**

35 Over 350,000 deaths worldwide have resulted from complications resulting from Severe Acute  
36 Respiratory Syndrome Coronavirus 2 (SARS-CoV-2) infection with another 6 million reported infected  
37 by this virus, causing a major pandemic. The overall public health and economic burden of this  
38 pandemic has yet to be realized and will only become apparent in the coming years. Switzerland alone  
39 has recorded one of the highest numbers of COVID-19 (the disease caused by caused by SARS-CoV-2)  
40 cases per capita in the world<sup>1</sup>. Thus, efficient and sensitive detection assays of SARS-CoV-2 are  
41 essential in managing this pandemic, as evidence suggests that the virus is most contagious on or  
42 before symptom onset. Furthermore, asymptomatic cases and the so-called “super spreaders” have  
43 broadly contributed to the dissemination of the virus, as reports from South Korea suggest<sup>2</sup>.  
44 Comprehensive contact tracing, tracking the spread of viral transmission, clearly requires an increase  
45 of mass testing to a population scale.

46 The vast majority of the currently available SARS-CoV-2 diagnostic assays are based on the  
47 amplification of specific loci in the viral genome through Real-Time Quantitative Polymerase Chain  
48 Reaction (RT-qPCR). RT-qPCR assays have been the gold standard in clinical diagnostics due to their  
49 high sensitivity. However, this outbreak has demonstrated that there exists a general lack of  
50 infrastructure for such population-scale testing, in addition to a limited supply of reagents for RT-qPCR  
51 tests. Furthermore, the outcome of RT-qPCR is a binary result (positive or negative) for the loci  
52 interrogated. The main drawback being the lack of genotypic information in RT-qPCR assays, which  
53 could enable the mapping of the spread and transmission, as well as the monitoring of the evolution  
54 of the etiological agent, which is crucial for vaccine development.

55 NGS has revolutionized biomedical research in the last 15 years and is increasingly impacting clinical  
56 diagnostics and the practice of medicine. Our aim was to develop a diagnostic assay that could profit  
57 from the power and sensitivity of these technologies, not only for viral detection but also for viral  
58 classification. In this study, we present HiDRA-seq, a low-cost, high-throughput targeted approach for  
59 SARS-CoV-2 infection diagnosis and for potentially tracing outbreak origin and tracking transmission.

60 In recent months, several protocols have been developed for SARS-CoV-2 diagnosis using NGS.  
61 However, most of the proposed methods are based on the amplification of the entire viral genome,  
62 which is time consuming, rather expensive, and require specific kits for enrichment (amplicon or  
63 hybridization based) as well as a comprehensive de novo pipeline to analyze the data and advanced  
64 bioinformatic pipelines<sup>3</sup>. We propose a midway and rapidly implementable option that uses genomics  
65 lab infrastructure and reagents available in large NGS facilities, bypassing the need for commercially  
66 available kits and the limitations in the global chain of production. HiDRA-seq combines reverse  
67 transcription using barcoded oligo-dT primers, adapted from mcSCRB-seq<sup>4</sup>, with the addition of virus-

68 specific amplicon generation and sequencing. The protocol targets a region of the putative ORF10,  
69 which is highly conserved in the different SARS-CoV-2 isolates sequenced to date. The targeted region  
70 is located near the 3'-end of the genome<sup>5,6</sup>, so HiDRA-seq can capture both the viral genomic RNA  
71 (gRNA) as well as all subgenomic RNA transcripts (sgRNA) generated in infected cells.

72 We would like to emphasize that our approach consists of a viral enrichment, followed by the  
73 generation of a small amount of short read sequencing data and the use of a basic bioinformatics  
74 pipeline for downstream mapping and diagnosis. The small amount of short read sequencing data  
75 required to correctly diagnose an individual allows the multiplexing of hundreds to thousands of  
76 patients in one sequencing run and is an affordable reality at a price of approximately 2 CHF/EUR/USD  
77 per sample (from extracted RNA to diagnosis). Furthermore, HiDRA-seq can be adapted by a wide  
78 variety of short read sequencers with diverse outputs across the clinics. The nature of the enrichment  
79 step in this protocol offers an enormous versatility, as it can be tailored to any other respiratory virus  
80 or organism of interest that produces poly-adenylated transcripts. The implementation of a rapid and  
81 versatile approach such as HiDRA-seq would definitely enable a more efficient outbreak  
82 management.

83

## 84 **Results**

### 85 **Protocol description**

86 Since the beginning of the SARS-CoV-2 pandemic, various research groups have been working on the  
87 development of alternative testing protocols to bypass the shortage of standard diagnostic kits and  
88 enable population scale testing. With this idea, we have developed HiDRA-seq, a high throughput,  
89 rapidly implementable solution that uses standard lab infrastructure and reagents in medium sized  
90 NGS facilities (**Figure 1A**). The reverse transcription and cDNA pooling strategies are adapted from the  
91 mcSCBR-seq protocol<sup>4</sup>. Using a low volume liquid handling robot, the patients' RNA (previously  
92 extracted from swab samples) is distributed in 384-well plates containing indexed oligo-dT primers. A  
93 short reverse transcription is performed to generate barcoded cDNA and the contents of each well  
94 are pooled into a single tube. Following bead purification and exonuclease treatment to digest the  
95 excess of unbound primers, the pooled cDNA is used as template in a PCR reaction with a forward  
96 primer specific to SARS-CoV-2 and a reverse primer binding to a sequence incorporated with the oligo-  
97 dT in the reverse transcription. Both primers contain the sequences required to generate an Illumina  
98 sequencer compatible library in a final PCR reaction, in which the amplicon pool can be barcoded,  
99 which allows the multiplexing of multiple 384-well plates in a single sequencing run. After sequencing,  
100 the reads are de-multiplexed based on both the plate and the sample barcodes and used in an

101 automated analysis pipeline to distinguish samples containing SARS-CoV-2-derived reads, which are  
102 diagnosed as positive.

103

#### 104 **SARS-CoV-2-specific amplicon design**

105 We designed three different partially over-lapping amplicons in order to compare their performance  
106 and, simultaneously, simulate the combination of three different patient plates that need to be de-  
107 multiplexed upon sequencing. For the amplicon design, highly conserved regions between SARS-CoV-  
108 2 isolates were identified by creating a whole genome alignment of the European SARS-CoV-2  
109 sequences (n = 1435, sequence identity = 98.96%). The identified sequences are not conserved in  
110 other human coronavirus. As cDNA is barcoded using indexed oligo-dT, the forward primers must be  
111 located close to the poly-A sequence in the viral genome to obtain amplicons of a reasonable size.  
112 Moreover, primers binding to the 3' of the genome can efficiently capture both the viral genomic RNA  
113 (gRNA) as well as all subgenomic RNA transcripts (sgRNAs) generated in infected cells, which may  
114 increase the sensitivity of the method. With these premises, we identified a 100% conserved region  
115 in the putative ORF10 of SARS-CoV-2. The GC content in this region is highly variable, so primers were  
116 designed to target sequences of lower GC contents (<50%). We designed three forward primers  
117 targeting this region that are used to generate three SARS-CoV-2 specific amplicons (**Figure 1B**). The  
118 three amplicons were tested separately in order to compare their performance. For the human  
119 internal control, we followed a similar strategy and designed a forward primer located in close  
120 proximity to the poly-A sequence of human GAPDH (Figure 1B). This ensures that a fragment that can  
121 be sequenced is always generated even in SARS-CoV-2 negative samples. The reverse primer is  
122 common to all amplicons and it anneals to the 3'-end of the barcoded oligo-dT used to generate the  
123 cDNA in the reverse transcription.

124

#### 125 **Initial data quality control**

126 For the implementation of the protocol, 91 anonymized clinical samples containing RNA extracted  
127 from patients' swabs were kindly provided by Dr. Michael Huber and Dr. Jürg Böni (Institute of Medical  
128 Virology, UZH, Switzerland). These clinical samples were transferred to four identical quadrants in a  
129 384-well plate, such that each sample would be processed in quadruplicate for each of the three SARS-  
130 CoV-2 amplicons designed and tested for the study. The samples were processed using a Mosquito HV  
131 liquid pipetting robot (SPT Labtech), as indicated in materials and methods, and sequenced in both an  
132 Illumina MiniSeq (R1=16 bp, i7=8 bp, R2=50 bp) and NovaSeq6000 sequencers (data not shown, R1=16  
133 bp, i7=8 bp, R2=150 bp). The 8 bases barcode was used, in this case, to discriminate the different  
134 amplicons but it could alternatively be used to de-multiplex several patient plates. The first 6 bases in

135 read one were used to demultiplex the reads generated from the different patient samples. UMI  
136 correction was not applied in this version of the protocol. The 50 bases in read 2 were used to  
137 distinguish between positive and negative patients by mapping reads against the SARS-CoV-2 genome.  
138 After demultiplexing and prior to mapping, the dataset was subjected to standard quality control  
139 checks and data filtering. As the input for the protocols was not normalized, a wide distribution in the  
140 number of reads per sample was observed (**Figure 2A**). Reads were filtered by abundance per  
141 sample/amplicon combination ( $n < 250$  for one sample/amplicon combination). 250 reads per  
142 sample/amplicon combination (750 reads per sample) was sufficient to minimize the minor effects of  
143 index hopping on the SARS-CoV-2 alignment rate for a given sample, and accurately represent the  
144 abundance of SARS-CoV-2-mapping reads in a given samples' data. Based on the RT-qPCR diagnostics  
145 results, samples for which GAPDH was undetectable after 40 cycles of RT-qPCR were removed, and  
146 finally 83 patient samples in technical quadruplicates remained.  
147 The alignment of reads to SARS-CoV-2 and GAPDH was performed using Bowtie2 using end-to-end  
148 mode. More than 99.9% of mapped reads mapped uniquely to the targeted locus, indicating successful  
149 primer design (**Figure 2B**). The global alignment rate of the reads was of 26.96%, 43.47% and 36.69%  
150 for amplicons 29652, 29691, and 29709, respectively.

151

### 152 **Diagnostic capability of the assay**

153 Ct values for sets of RT-qPCR technical replicates were normalized and correlated to the alignment  
154 rate using the Wilcoxon-Signed-Rank test for matched pairs ( $p < 0.001$  for each amplicon; see **Figure**  
155 **3A**). The per sample alignment rate is shown to be highly correlated with RT-qPCR Ct value (see **Figure**  
156 **3B**). Samples which returned a Ct value  $> 25$  for SARS-CoV-2 in the diagnostic test, had their alignment  
157 rates fall, typically within one standard deviation of the mean alignment rate, for the set of samples  
158 diagnosed "negative" with RT-qPCR. This demonstrates that HiDRA-seq is thus far, incapable of  
159 identifying with certainty positive samples with a RT-qPCR Ct value  $> 25$ . However, there were two  
160 exceptions in which the HiDRA-seq system was able to successfully diagnose samples with Ct values  $>$   
161 37. Amplicon 29691 generated the results most consistent with the RT-qPCR diagnosis for Ct values  
162 within the range 29 – 40 (see **Figure 3C**).

163 We generated potential diagnostic thresholds, based upon the alignment rate (AR) of a sample's reads  
164 to the SARS-CoV-2 genome, by iterating through values on  $[0,1]$  in increments of 0.01. We counted for  
165 each value, the number of positively diagnosed samples (via RT-qPCR) that had ARs below this value,  
166 and the number of negatively diagnosed samples (via RT-qPCR) that had ARs above this value. We  
167 then selected intervals for which the number of false diagnoses were minimized as a basis for a  
168 theoretical diagnostic threshold. Potential diagnostic thresholds were set individually for each

169 amplicon as follows (see **Figure 4**): Amplicon 29652: AR  $\epsilon$  [0.02 , 0.11]; Amplicon 29691: AR  $\epsilon$  [0.05 ,  
170 0.24]; Amplicon 29709: AR  $\epsilon$  [0.04 , 0.18]. On the intervals of AR values for which the number of false  
171 diagnoses was minimized, amplicons 29652 and 29709 mis-diagnosed 8 patients and Amplicon 29692  
172 mis-diagnosed 7 patients. Furthermore, amplicons 29652, 29709 and 29692 had a successful  
173 diagnostic rate with respect to RT-qPCR diagnosis of 90.4%, 90.4% and 91.6%, respectively.

174

## 175 **Discussion**

176 The surge in cases of SARS-CoV-2 infections around the world has created an urgent need for accurate  
177 and fast diagnostic testing solutions. Despite the recent increase in available SARS-CoV-2 diagnostic  
178 testing kits in the past few months, the majority of tests still rely on real-time quantitative PCR (RT-  
179 qPCR). Whilst RT-qPCR reactions are generally very sensitive (*i.e.* able to detect true positive cases)  
180 and specific, the technology has inherent limitations with regard to large scale population screening,  
181 which has become increasingly important during this pandemic. Additionally, RT-qPCR does not  
182 provide any genotypic information regarding a patient's infection beyond the causal organism.  
183 Another advantage of NGS over RT-qPCR is that NGS provides a direct and functional measurement  
184 SARS-CoV-2. RT-qPCR generates florescent measurements for individual plate wells, indirectly  
185 quantifying the presence of genetic material in relative concentrations. Alternatively, NGS generates  
186 thousands of reads, directly measuring the specific sequences present in a sample. The sequence  
187 information generated could provide insight into the specific infecting isolate and aid in tracing  
188 transmission within communities.

189 HiDRA-seq, built on Next Generation Sequencing technology, has the ability to multiplex thousands of  
190 barcoded patient samples, significantly increasing current testing capacity. Our method is designed to  
191 be partially performed on a small automated liquid handling machine, so that a single person is able  
192 process more than 2,000 RNA samples per day with ease. This results in an overall shorter diagnostic  
193 turnaround time, with library preparation and sequencing data obtained in as little as 1.5 days. Our  
194 system does not match the speed of RT-qPCR for individual samples. However, it outperforms  
195 standard diagnostics methods in scale, allowing one to process hundreds of thousands of samples per  
196 week if extended and automated at scale. The faster a test can be administered, the sooner the results  
197 can be received, and the quicker measures can be put in place to mitigate further spread or to evaluate  
198 the impact of loosened containment measures. This system also minimizes the errors in sample  
199 handling by fast-tracking sample preparation, an integral part of the workflow. The achievement of  
200 consistent data across samples verifies the reproducibility and reliability of our system. Additionally,  
201 the miniaturization of our reactions results in a much more affordable solution compared to other

202 methodologies available in the market. Our estimated price for sample screening from extracted RNA  
203 to diagnostic result with our approach is 2 CHF/EUR/USD.

204 By comparing our results to the RT-qPCR-based clinical diagnostic test, we show that the mapping rate  
205 is a strong predictor of Ct values ( $p < 0.001$ ). Our method is sensitive, as we have been able to correctly  
206 recall positive samples in >90% of the cases, which is comparable to other NGS-based methods use  
207 for virus detection in clinical samples<sup>7</sup>. The samples that escaped detection are characterized by  
208 having high Ct values from the diagnostic RT-qPCR ( $Ct > 25$ ). In parallel to HiDRA-seq, we prepared  
209 libraries using the highly sensitive Smart-seq2 protocol<sup>8</sup>, which captures all poly-adenylated RNA in  
210 the sample, and we were similarly unable to detect a significant number of virus-derived reads. The  
211 sensitivity of HiDRA-seq could be improved by slightly increasing the number of PCR cycles used in the  
212 amplicon generation and using UMI correction for detection of PCR duplicates to increase the  
213 quantitative accuracy of the method. Although we were able to successfully diagnose the majority of  
214 samples using 50 bp reads, the designed primers allowed us to access 71 bp of a highly variable region  
215 (following Amplicon 29709) by generating reads of 150 bp, raising the possibility of using this method  
216 for basic phylogenetic and epidemiological studies of isolates differing at this genomic position.

217 HiDRA-seq will be optimized to enable direct lysis from saliva collected by gargling. Given that the  
218 mcSCRB-seq<sup>4</sup> method, from which this protocol derives, is designed to work with direct lysis from  
219 single cells, this approach will be adapted for HiDRA-seq, since RNA extraction is one of the biggest  
220 bottle-necks for large scale testing. The current sensitivity of our method makes it compatible with  
221 direct testing from saliva, as suggested in a recent publication<sup>9</sup>.

222 Our method uses barcoded oligo-dT primers to generate cDNA in the reverse transcription and this  
223 feature leaves the door open to expanding the amplicon panel. To achieve this, additional PCR primers  
224 could be added to generate amplicons that are specific for other human coronaviruses (hCoVs) or  
225 other respiratory virus that produce polyadenylated transcripts. Such viruses include influenza viruses  
226 (IAVs), respiratory syncytial viruses (RSVs), parainfluenza viruses (PIVs) or human metapneumoviruses  
227 (MPVs), which would create a multi-viral identification test at almost no extra cost. Potentially, this  
228 approach could also be implemented to specifically detect the expression of virtually any human  
229 mRNA identified as a biomarker for estimating disease susceptibility and progression, or for designing  
230 host group-specific COVID-19 treatment regimens. This is especially relevant in a clinical research  
231 setup, in which the importance of a test that could both identify an infection and give information on  
232 how to best treat that infection cannot be overstated.

233 This method has been designed with the practical necessities of large scale, affordable, adaptable and  
234 rapid testing in mind. To these ends, we have developed a first version of a method that reuses  
235 relatively common sets of barcoding primers available in NGS facilities, can scale effectively, does not

236 involve exotic reagents and relies on NGS to multiplex samples for both cost and time savings, allowing  
237 any well-equipped sequencing lab in the world to quickly begin testing.

238

## 239 **Materials and Methods**

### 240 **Primer sequences**

| Primer name                   | Sequence                                                                     |
|-------------------------------|------------------------------------------------------------------------------|
| <b>Barcoded Oligo-dT</b>      | 5'-Bio-ACACTCTTCCCTACACGACGCTCTCCGATCTNNNNNNNNNNNNNNNNNT <sub>30</sub> VN-3' |
| <b>PCR</b>                    | 5'-Bio-ACACTCTTCCCTACACGACGC-3'                                              |
| <b>SCoV2_29691</b>            | 5'-GTCTCGTGGGCTCGGAGATGTGTATAAGAGACAGCTCACATAGCAATCTTTAATCAGTG-3'            |
| <b>SCoV2_29709</b>            | 5'-GTCTCGTGGGCTCGGAGATGTGTATAAGAGACAGCAGTGTGTAACATTAGGGAGGAC-3'              |
| <b>SCoV2_29652</b>            | 5'-GTCTCGTGGGCTCGGAGATGTGTATAAGAGACAGCGTAACTACATAGCACAAGTAGATG-3'            |
| <b>GAPDH_1127</b>             | 5'-GTCTCGTGGGCTCGGAGATGTGTATAAGAGACAGGCTCATTTCTGGTATGACAACG-3'               |
| <b>i5 primer</b>              | 5'-AATGATACGGCGACCACCGAGATCTACACTCTTCCCTACACGACGCTCTCCGATCT-3'               |
| <b>i7 primer (Nextera XT)</b> | 5'-CAAGCAGAAGACGGCATAACGAGATNNNNNNNNGTCTCGTGGGCTCGG-3'                       |

241

### 242 **Reverse transcription with barcoded oligo-dT**

243 This part of the protocol is based on the reverse transcription strategy used in mcSCRb-seq (Bagnoli  
244 et al., 2018). A 384-well barcoding plate was prepared using a Mosquito HV liquid handling robot (SPT  
245 Labtech), each of the wells containing 0.5 µl of lysis solution (0.2% Triton X-100 [Roche], 0.8 units of  
246 RNasin Plus [Promega], 4 mM dNTPs [Promega] and 1 µM of barcoded oligo-dT primers [E3V6NEXT,  
247 IDT]). The plate was divided into four quadrants (91 samples each) with four identical copies of a 96-  
248 well plate containing RNA extracted from anonymous patients' swaps (kindly provided by Dr. Michael  
249 Huber and Dr. Jürg Böni, Institute of Medical Virology, UZH, Switzerland) by transferring 0.5 µl of RNA  
250 to the corresponding well positions. The plate was heated at 65° C for 5 minutes and transferred to  
251 ice prior to the addition of 1 ul of 2X Reverse transcription mix (15% PEG 8000 [Sigma Aldrich], 2X  
252 Maxima RT buffer [Thermo Fischer] and 4 units of Maxima H Minus RT [Thermo Fisher]). cDNA  
253 synthesis was performed for 15 min at 50°C followed by 5 min at 85° C for inactivation. The Mosquito  
254 HV liquid handling robot (SPT Labtech) was used to pool the whole 384-well plate containing the  
255 barcoded cDNA into a single 2 ml DNA LoBind tubes (Eppendorf) and cleaned up using Sera-Mag Select  
256 beads (GE Healthcare) with a ratio 1:0.8 (pooled cDNA:beads). Purified cDNA was eluted in 17 µl and  
257 residual primers digested with Exonuclease I (Thermo Fisher) for 20 min at 37 °C.



## 258 **SARS-CoV-2-specific amplicon generation**

259 Three different SARS-CoV-2-specific primers (SCoV2\_29691, SCoV2\_29709, SCoV2\_29652) were used  
260 in individual PCR reactions, in combination with a human GAPDH-specific primer (GAPDH\_1127) and  
261 a PCR primer binding to the barcoding sequence, to generate three virus specific amplicons. These  
262 primers also contain the adaptor sequences needed to incorporate the Illumina compatible flow cell  
263 binding sequences in a subsequent PCR reaction. Briefly, each PCR reaction was assembled by  
264 combining 5 ul of the pooled barcoded cDNA with 20 µl of PCR master mix (1.25X KAPA HiFi HotStart  
265 ReadyMix [Roche], 0.375 uM of SARS-CoV-2- and GAPDH-specific primers [Microsynth AG] and 0.375  
266 uM of the PCR primer [Microsynth AG]). PCR was performed using the following program: 3 min at  
267 98 °C for initial denaturation followed by 25 cycles of 20 sec at 98 °C, 15 sec at 60 °C, 15 sec at 72 °C.  
268 Final elongation was performed for 5 min at 72 °C. Once the PCR was concluded, the amplicons were  
269 cleaned up using Sera-Mag Select beads (GE Healthcare) with a ratio 1:0.8 (DNA:beads). The size and  
270 concentration of the amplicons was analyzed in a 4200 TapeStation System (Agilent) using a D1000  
271 ScreenTape.

272

## 273 **Library generation and plate barcoding incorporation**

274 A final PCR was performed from the amplicon to generate libraries compatible with Illumina  
275 sequencer. In parallel, three different barcodes were assigned for the aforementioned amplicons in  
276 order to combine them in a single sequencing run. This strategy can be used to combine different  
277 plates with patient samples, allowing one to easily increase the throughput of the protocol. Each PCR  
278 reaction was assembled by combining, in individual tubes, 5 ul of the three amplicons with 20 µl of  
279 PCR master mix containing 1.25X KAPA HiFi HotStart ReadyMix (Roche), 0.375 uM of the i5 primer  
280 (Microsynth AG) and 0.375 uM of the barcoded i7 primer (Illumina). PCR was performed using the  
281 following program: 3 min at 98 °C for initial denaturation followed by 5 cycles of 20 sec at 98 °C, 15 sec  
282 at 55 °C, 15 sec at 72 °C. A final elongation was performed for 5 min at 72 °C. Once the PCR was  
283 completed, the libraries were cleaned up using Sera-Mag Select beads (GE Healthcare) with a ratio  
284 1:0.8 (DNA:beads). The size and concentration of the libraries were analyzed in a 4200 TapeStation  
285 System (Agilent) using a D1000 ScreenTape.

286

## 287 **Sequencing**

288 The three libraries generated from three different viral amplicons, all in combination with a GAPDH-  
289 derived library, were paired-end sequenced together in both an Illumina MiniSeq (R1=16 bp, i7=8 bp,  
290 R2=50 bp) and NovaSeq6000 sequencers (data not shown, R1=16 bp, i7=8 bp, R2=150 bp). PhiX was  
291 added to account for 25% of the total library, to increase library diversity and subsequently,

292 sequencing performance. The 6 first bases in read one were used to demultiplex the reads generated  
293 from the different patient. The 8 bases in the barcode allowed, in this case, to discriminate the  
294 different amplicons but it could alternatively be used to multiplex several patient plates for  
295 sequencing. The 50/150 bases in read 2 were used to distinguish between positive and negative  
296 patients by mapping reads against the SARS-CoV-2 genome.

297

### 298 **Bioinformatic analysis**

299 Reads were segregated by patient, amplicon and plate. The demultiplexed reads were then processed  
300 using the standard tools displayed below. A consensus sequence for SARS-CoV-2 genome was  
301 generated from the set of published genomes on NCBI using the Bio.Align Python 3 package (data not  
302 shown). Bowtie2<sup>10</sup>, samtools<sup>11,12</sup> and pysam were used to generate pileup columns and calculate  
303 alignment rates for a subset of our samples, on all loci in the SARS-CoV-2 transcriptome to verify the  
304 locus-specificity of our primers. After verifying the quality of our reads, Bowtie2 was used to map all  
305 of our samples against the SARS-CoV-2 genomic region of interest (from 29600 bp to 29900 bp,  
306 inclusive), and GAPDH. Alignment rates were calculated as a ratio of total reads for a given sample, to  
307 the number of reads aligning to our region of interest on the SARS-CoV-2 genome.

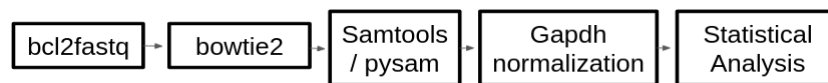

308

309 Samples for which the initial diagnostic PCR failed (*i.e.* GAPDH was undetectable after 40 cycles of  
310 PCR) were filtered from the dataset. Additionally, samples for which we recovered less than 250  
311 sequencing reads per amplicon were filtered out of the dataset. After filtering had been applied, our  
312 dataset contained 83 sets of patient quadruplicates. Undetected Ct values of SARS-CoV-2 were  
313 imputed and values were then normalized to GAPDH using the Livak and Schmittgen method<sup>13</sup>. The  
314 Wilcoxon Signed-Rank Test was applied to the set of patient replicates, comparing the SARS-CoV-2  
315 alignment rate and the normalized Ct value recovered from RT-qPCR ( $p < 0.0001$  for each amplicon).

316

### 317 **References**

- 318 1. Marcel, S. et al. COVID-19 epidemic in Switzerland: On the importance of testing, contact tracing  
319 and isolation. Swiss Med. Wkly. (2020). doi:10.4414/smw.2020.20225
- 320 2. Ki, M. Epidemiologic characteristics of early cases with 2019 novel coronavirus (2019-nCoV)  
321 disease in Korea. Epidemiol. Health (2020). doi:10.4178/epih.e2020007
- 322 3. St Hilaire, B. G. et al. A rapid, low cost, and highly sensitive SARS-CoV-2 diagnostic based on whole  
323 genome sequencing. bioRxiv 2020.04.25.061499 (2020). doi:10.1101/2020.04.25.061499
- 324 4. Bagnoli, J. W. et al. Sensitive and powerful single-cell RNA sequencing using mcSCR-seq. Nat.

- 325 Commun. 9, 2937 (2018).
- 326 5. Sola, I., Almazán, F., Zúñiga, S. & Enjuanes, L. Continuous and Discontinuous RNA Synthesis in  
327 Coronaviruses. *Annu. Rev. Virol.* 2, 265–288 (2015).
- 328 6. Kim, D. et al. The Architecture of SARS-CoV-2 Transcriptome. *Cell* 181, 914-921.e10 (2020).
- 329 7. Huang, B. et al. Illumina sequencing of clinical samples for virus detection in a public health  
330 laboratory. *Sci. Rep.* 9, 5409 (2019).
- 331 8. Picelli, S. et al. Smart-seq2 for sensitive full-length transcriptome profiling in single cells. *Nat.*  
332 *Methods* 10, 1096–1098 (2013).
- 333 9. Wyllie, A. L. et al. Saliva is more sensitive for SARS-CoV-2 detection in COVID-19 patients than  
334 nasopharyngeal swabs. *medRxiv* 2020.04.16.20067835 (2020).  
335 doi:10.1101/2020.04.16.20067835
- 336 10. Langmead, B. & Salzberg, S. L. Fast gapped-read alignment with Bowtie 2. *Nat. Methods* 9, 357–  
337 359 (2012).
- 338 11. Li, H. et al. The Sequence Alignment/Map format and SAMtools. *Bioinformatics* 25, 2078–2079  
339 (2009).
- 340 12. Li, H. A statistical framework for SNP calling, mutation discovery, association mapping and  
341 population genetical parameter estimation from sequencing data. *Bioinformatics* 27, 2987–2993  
342 (2011).
- 343 13. Livak, K. J. & Schmittgen, T. D. Analysis of Relative Gene Expression Data Using Real-Time  
344 Quantitative PCR and the  $2^{-\Delta\Delta CT}$  Method. *Methods* 25, 402–408 (2001).
- 345
- 346
- 347
- 348
- 349
- 350
- 351
- 352
- 353
- 354
- 355
- 356
- 357
- 358

359 **Figures**

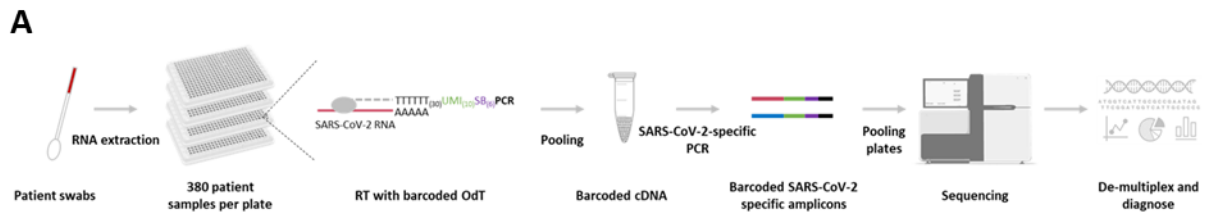

**B**

| Label       | Amplicon insert size | 5'-3' Primer sequence      | GC % | Lentgh bp | Tm °C | Amplicon Size PCR 1 |
|-------------|----------------------|----------------------------|------|-----------|-------|---------------------|
| SCoV2_29709 | 161                  | CAGTGTGTACATTAGGGAGGAC     | 47.8 | 23        | 60    | 298                 |
| SCoV2_29691 | 179                  | CTCACATAGCAATCTTTAATCAGTG  | 36   | 25        | 57.7  | 318                 |
| SCoV2_29652 | 218                  | CGTAACTACATAGCACAAAGTAGATG | 40   | 25        | 58.7  | 357                 |
| GAPDH_1124  | 259                  | GCTCATTTCCTGGTATGACAACG    | 47.8 | 23        | 61.4  | 396                 |

360

361

362 **Figure 1. (A) Schematic representation of the protocol.** Using a low volume liquid handling robot, the  
 363 patients' RNA is distributed in 384-well plates containing indexed oligo-dT primers. Barcoded cDNA is  
 364 generated by reverse transcription and pooled into a single tube. Libraries are produced from SARS-  
 365 CoV-2-specific amplicons and sequenced. Reads are de-multiplexed based on both a plate and a  
 366 sample barcode and used for downstream diagnostic analysis. **(B) Amplicon primer design.** The table  
 367 contains the sequences of the forward primers used to generate the different amplicons. The reverse  
 368 primer is common to all amplicons and it anneals to the 3'-end of the barcoded oligo-dT primers used  
 369 to generate cDNA in the reverse transcription. The primer labels contain the position of the first  
 370 sequenced base. Insert length was calculated using the start of the poly-A sequence. SARS-CoV-2  
 371 NC\_045512\_2 sequence and GAPDH NM\_002046.4 sequence were used as reference. For the  
 372 theoretical size of the amplicon after PCR 1 the Nextera Tag (34bp), the length of the barcoded Oligo-  
 373 dT-primer (80bp) and the primer sequence was added.

374

375

376

377

378

379

380

381

382

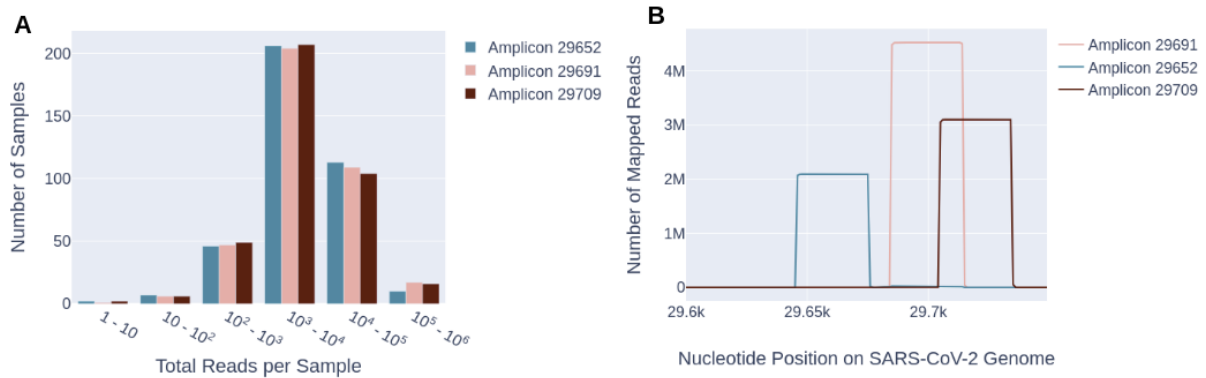

383

384 **Figure 2. (A) Read distribution in the different wells of the plate.** The histogram shows the read  
385 numbers obtained in the different wells of the plate for the different amplicons. As the input for the  
386 protocols was not normalized, a wide distribution in the number of reads is observed. Wells with <250  
387 reads were discarded for further analysis. **(B) Read alignment to SARS-CoV-2 genome.** The number of  
388 reads aligning to the 3'-end of viral genome is shown for the different amplicons. More than 99.9% of  
389 reads aligning to SARS-CoV-2 mapped to the locus targeted in the amplicon design.

390

391

392

393

394

395

396

397

398

399

400

401

402

403

404

405

406

407

408

409

410

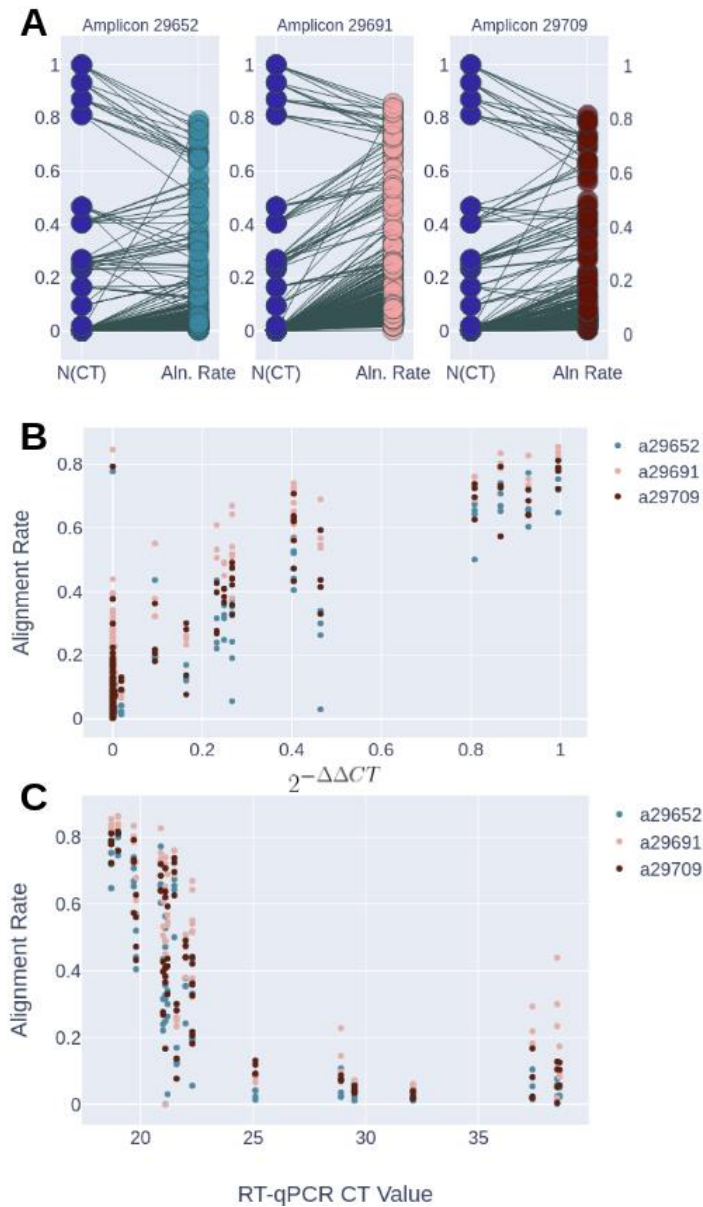

411

412

413 **Figure 3. (A) Matched pairs of normalized Ct values and alignment rate.** Ct values (y-axis-left) for sets  
414 of RT-qPCR technical replicates were normalized ( $N(Ct) = 2^{-\Delta\Delta Ct}$ ) and correlated to the alignment rate  
415 (y-axis-right) for the different amplicons using the Wilcoxon-Signed-Rank test for matched pairs ( $p <$   
416  $0.001$ ). **(B) Correlation of normalized Ct values and alignment rate.** One point is shown for each  
417 sample and amplicon combination, coloured by amplicon type. The normalised Ct value on the x-axis,  
418 mapped against its corresponding alignment rate on the y-axis. **(C) Alignment rate vs. raw Ct values**  
419 **for samples diagnosed positive via RT-qPCR.** This figure shows one point for each sample and  
420 amplicon combination, and displays only those samples that were diagnosed positive via RT-qPCR. The  
421 x-axis shows the Ct value associated with these positive samples, with their corresponding alignment  
422 rate shown on the y-axis. This demonstrates a sensitivity threshold for HiDRA-seq in terms of RT-qPCR  
423 Ct values ( $Ct \approx 25$ ).

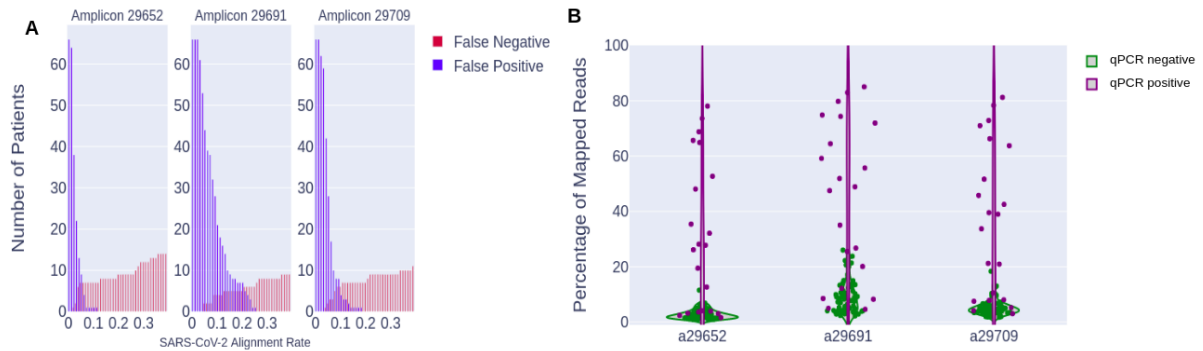

424

425

426 **Figure 4. (A) Histogram of false diagnoses for potential diagnostic thresholds:** For each amplicon

427 used, the number of potential mischaracterized diagnoses (false-positives in blue or false-negatives in

428 red), in numbers of patients (y-axis), are shown for a given alignment rate threshold (x-axis). Original

429 diagnoses are given via RT-qPCR. Amplicon 29691 is shown to have the fewest number of mis-

430 characterized diagnoses (7) when said diagnoses are minimized, and Amplicon 29652 is shown to have

431 the shortest span of intersection between both distributions (0.9). **(B) Distributions of alignment rates**

432 **for positive and negative patient quadruplicates, by amplicon:** For each amplicon, the mean

433 percentage (across four replicates) of reads that aligned to the SARS-CoV-2 genome (y-axis) is shown

434 as a point, with patients diagnosed positive via RT-qPCR shown in purple and patients diagnosed

435 negative via RT-qPCR shown in green. The distribution of alignment rates for patients diagnosed

436 positive with RT-qPCR is shown to be much wider (spanning roughly 87 percentiles on average) than

437 those diagnosed negative (spanning roughly 14 percentiles on average).

438

439

440

441

442

443

444

445

446

447

448

449 **Author contributions**

450 CA and RS conceived the study. EY, GW, SK, LP and CA designed the protocol, prepared the libraries  
451 and sequenced them. Sequencing data was processed and analysed by GW and LO. EY, GW, SK, LO,  
452 LP, TS, MDM, CA and RS wrote the manuscript.

453

454 **Acknowledgments**

455 We thank Dr. Michael Huber and Dr. Jürg Böni (Institute of Medical Virology, University of Zurich,  
456 Switzerland) for providing the RNA extracted from patients' samples used for the implementation of  
457 the protocol. We are grateful to Prof. Andreas Moor (D-BSSE, ETH Basel, Switzerland) for providing  
458 the set of 384 barcoded oligo-dT primers used in this protocol.

459

460 **Competing interests**

461 The authors declare no competing interests.

462

463 **Data availability**

464 Sequencing data generated here are available at ENA under accession PRJEB38511.
